# Supplementary material for: CoCoCo: a free suite of multiconformational chemical databases for high-throughput virtual screening purposes
Source: Royal Society of Chemistry journal article supplement (doi:10.1039/c0mb00039f), 2010-08-09
Supplement: c0mb00039f.pdf [file c0mb00039f.pdf]

## Supplementary Data

### *Common preparation procedures*

Table 1SD. Properties of molecular hash codes.

| Molecular HASH codes | Tautomer invariant | Stereo sensitive |
|----------------------|--------------------|------------------|
| HASHY                | no                 | no               |
| HASHSY               | no                 | yes              |
| TAUTO_HASH           | yes                | no               |
| STEREO_TAUTO_HASH    | yes                | yes              |

Table 2SD. Complete overview of the computational preparation steps for each chemical vendor collection.

| Chemical provider | Records in the original file | Failed 3D conversion | After Corina | Failed hash code calculation | Internal duplicates <sup>a</sup> | After internal duplicates removal |
|-------------------|------------------------------|----------------------|--------------|------------------------------|----------------------------------|-----------------------------------|
| Asinex            | 261606                       | 21                   | 261585       | 0                            | 208                              | 261382                            |
| Chembridge        | 603253                       | 331                  | 602922       | 0                            | 352                              | 602575                            |
| ChemDiv           | 789834                       | 24                   | 789810       | 0                            | 27618                            | 762192                            |
| Life Chemicals    | 316539                       | 2                    | 316537       | 0                            | 276                              | 316261                            |
| NCI Open          | 260071                       | 2523                 | 257548       | 171                          | 17450                            | 239927                            |
| Princeton         | 1082074                      | 34                   | 1082040      | 32                           | 107324                           | 974684                            |
| Enamine           | 1350112                      | 12                   | 1350100      | 28                           | 18                               | 1350054                           |
| Specs             | 201570                       | 14                   | 201556       | 0                            | 1                                | 201555                            |

a) Internal duplicates include stereoisomeric forms that are removed from original chemical provider databases. This information is restored in subsequent preparation steps where stereoisomers are recalculated more thoughtfully

Table 3SD. Overview of the tautomer and stereoisomer preparation steps.

| Cumulative records after file cleaning and duplicate removals | Added tautomers | Added stereoisomers | Cumulative records after tautomers and stereoisomers addition |
|---------------------------------------------------------------|-----------------|---------------------|---------------------------------------------------------------|
| 3727751                                                       | 256838          | 2996967             | 6981566                                                       |

## CoCoCo-SC

Table 4SD. Example of a CoCoCo-SC sdf entry

---

Exemple of sdf record

---

951

```

51 54 0 0 1 0      999 V2000
-0.6884  1.7210 -0.3023 N  0 0 1 0 0 0 0 0 0 0 0 0 0 0
-0.9539 -0.6067 -0.7657 N  0 0 1 0 0 0 0 0 0 0 0 0 0 0
-0.2422  0.3652  0.0859 C  0 0 2 0 0 0 0 0 0 0 0 0 0 0
-1.5114 -0.5940  5.6134 N  0 3 0 0 0 0 0 0 0 0 0 0 0 0
-1.7043 -1.4951  0.0081 C  0 0 0 0 0 0 0 0 0 0 0 0 0 0
 0.3645  2.6356 -0.2254 C  0 0 0 0 0 0 0 0 0 0 0 0 0 0
-1.8260  0.1716 -1.6763 C  0 0 0 0 0 0 0 0 0 0 0 0 0 0
-1.1635  1.5715 -1.7042 C  0 0 0 0 0 0 0 0 0 0 0 0 0 0
-1.1848 -0.3472  4.1910 C  0 0 0 0 0 0 0 0 0 0 0 0 0 0
-0.5747  0.1140  1.5342 C  0 0 0 0 0 0 0 0 0 0 0 0 0 0
-0.8609 -1.3978  6.2570 O  0 5 0 0 0 0 0 0 0 0 0 0 0 0
-2.4306  0.0067  6.1403 O  0 0 0 0 0 0 0 0 0 0 0 0 0 0
 0.4437  3.6839 -1.1334 C  0 0 0 0 0 0 0 0 0 0 0 0 0 0
-2.9187 -1.0925  0.5492 C  0 0 0 0 0 0 0 0 0 0 0 0 0 0
-1.9190  0.5698  3.4623 C  0 0 0 0 0 0 0 0 0 0 0 0 0 0
-0.1416 -1.0291  3.5930 C  0 0 0 0 0 0 0 0 0 0 0 0 0 0
-1.6140  0.8003  2.1339 C  0 0 0 0 0 0 0 0 0 0 0 0 0 0
 0.1634 -0.7986  2.2645 C  0 0 0 0 0 0 0 0 0 0 0 0 0 0
 1.4860  4.5863 -1.0545 C  0 0 0 0 0 0 0 0 0 0 0 0 0 0
-3.6580 -1.9734  1.3139 C  0 0 0 0 0 0 0 0 0 0 0 0 0 0
 1.3316  2.5022  0.7628 C  0 0 0 0 0 0 0 0 0 0 0 0 0 0
-1.2404 -2.7849  0.2337 C  0 0 0 0 0 0 0 0 0 0 0 0 0 0
 2.3714  3.4082  0.8359 C  0 0 0 0 0 0 0 0 0 0 0 0 0 0
-1.9848 -3.6607  0.9993 C  0 0 0 0 0 0 0 0 0 0 0 0 0 0
-3.1906 -3.2549  1.5412 C  0 0 0 0 0 0 0 0 0 0 0 0 0 0
 2.4503  4.4473 -0.0731 C  0 0 0 0 0 0 0 0 0 0 0 0 0 0
-4.9754 -1.5374  1.9016 C  0 0 0 0 0 0 0 0 0 0 0 0 0 0
 1.5731  5.7236 -2.0395 C  0 0 0 0 0 0 0 0 0 0 0 0 0 0
 0.8329  0.2725 -0.0677 H  0 0 0 0 0 0 0 0 0 0 0 0 0 0
-1.8318 -0.2701 -2.6727 H  0 0 0 0 0 0 0 0 0 0 0 0 0 0
-2.8385  0.2342 -1.2774 H  0 0 0 0 0 0 0 0 0 0 0 0 0 0
-1.8940  2.3420 -1.9509 H  0 0 0 0 0 0 0 0 0 0 0 0 0 0
-0.3264  1.5910 -2.4020 H  0 0 0 0 0 0 0 0 0 0 0 0 0 0
-0.3089  3.7928 -1.9003 H  0 0 0 0 0 0 0 0 0 0 0 0 0 0
-3.2841 -0.0917  0.3723 H  0 0 0 0 0 0 0 0 0 0 0 0 0 0
-2.7315  1.1055  3.9306 H  0 0 0 0 0 0 0 0 0 0 0 0 0 0
 0.4351 -1.7420  4.1635 H  0 0 0 0 0 0 0 0 0 0 0 0 0 0
-2.1907  1.5132  1.5633 H  0 0 0 0 0 0 0 0 0 0 0 0 0 0
 0.9754 -1.3348  1.7960 H  0 0 0 0 0 0 0 0 0 0 0 0 0 0
 1.2704  1.6911  1.4732 H  0 0 0 0 0 0 0 0 0 0 0 0 0 0
-0.2989 -3.1026 -0.1895 H  0 0 0 0 0 0 0 0 0 0 0 0 0 0
 3.1237  3.3051  1.6039 H  0 0 0 0 0 0 0 0 0 0 0 0 0 0
-1.6248 -4.6636  1.1751 H  0 0 0 0 0 0 0 0 0 0 0 0 0 0
-3.7708 -3.9417  2.1395 H  0 0 0 0 0 0 0 0 0 0 0 0 0 0
 3.2644  5.1545 -0.0137 H  0 0 0 0 0 0 0 0 0 0 0 0 0 0
-5.7781 -1.7588  1.1983 H  0 0 0 0 0 0 0 0 0 0 0 0 0 0
-5.1519 -2.0727  2.8346 H  0 0 0 0 0 0 0 0 0 0 0 0 0 0
-4.9490 -0.4654  2.0972 H  0 0 0 0 0 0 0 0 0 0 0 0 0 0
 1.0363  6.5869 -1.6460 H  0 0 0 0 0 0 0 0 0 0 0 0 0 0
 2.6186  5.9874 -2.1984 H  0 0 0 0 0 0 0 0 0 0 0 0 0 0
 1.1271  5.4192 -2.9863 H  0 0 0 0 0 0 0 0 0 0 0 0 0 0
1 3 1 0 0 0 0

```

---

---

1 6 1 0 0 0 0  
1 8 1 0 0 0 0  
2 3 1 0 0 0 0  
2 5 1 0 0 0 0  
2 7 1 0 0 0 0  
3 10 1 0 0 0 0  
3 29 1 0 0 0 0  
4 9 1 0 0 0 0  
4 11 1 0 0 0 0  
4 12 2 0 0 0 0  
5 14 2 0 0 0 0  
5 22 1 0 0 0 0  
6 13 1 0 0 0 0  
6 21 2 0 0 0 0  
7 8 1 0 0 0 0  
7 30 1 0 0 0 0  
7 31 1 0 0 0 0  
8 32 1 0 0 0 0  
8 33 1 0 0 0 0  
9 16 1 0 0 0 0  
9 15 2 0 0 0 0  
10 17 2 0 0 0 0  
10 18 1 0 0 0 0  
13 19 2 0 0 0 0  
13 34 1 0 0 0 0  
14 20 1 0 0 0 0  
14 35 1 0 0 0 0  
15 17 1 0 0 0 0  
15 36 1 0 0 0 0  
16 18 2 0 0 0 0  
16 37 1 0 0 0 0  
17 38 1 0 0 0 0  
18 39 1 0 0 0 0  
19 28 1 0 0 0 0  
19 26 1 0 0 0 0  
20 27 1 0 0 0 0  
20 25 2 0 0 0 0  
21 23 1 0 0 0 0  
21 40 1 0 0 0 0  
22 24 2 0 0 0 0  
22 41 1 0 0 0 0  
23 26 2 0 0 0 0  
23 42 1 0 0 0 0  
24 25 1 0 0 0 0  
24 43 1 0 0 0 0  
25 44 1 0 0 0 0  
26 45 1 0 0 0 0  
27 46 1 0 0 0 0  
27 47 1 0 0 0 0  
27 48 1 0 0 0 0  
28 49 1 0 0 0 0  
28 50 1 0 0 0 0  
28 51 1 0 0 0 0  
M CHG 2 4 1 11 -1  
M END  
> <CoCoCo\_ID>  
951  
  
> <VENDOR>  
ANG,CHD  
  
> <M\_VENDOR\_TAUTOMER>  
1

---

```
> <M_TAUTO_HASH>
CF52BCE9F38F105B

> <M_HASHY>
CF52BCE9F38F105B

> <M_HASHSY>
CF52BCE9F38F105B

> <M_STEREO_TAUTO_HASH>
CF52BCE9F38F105B

$$$$
```

Table 5SD. Specifications of properties stored in the field codes of the CoCoCo-SC database

| Field codes provided in the sdf file | Description                                                                                                    |
|--------------------------------------|----------------------------------------------------------------------------------------------------------------|
| CoCoCo_ID                            | Integer that reports CoCoCo ID. The same integer serves also as a name for each sdf entry                      |
| VENDOR                               | String that reports in a comma separated format the abbreviations of the vendor that sells the entry molecules |
| M_VENDOR_TAUTOMER                    | If equals to 1 the reported tautomer is not calculated                                                         |
| M_HASHY                              | Molecular hash codes                                                                                           |
| M_HASHSY                             | Stereo sensitive molecular hash codes                                                                          |
| M_TAUTO_HASH                         | Tautomer invariant molecular hash codes                                                                        |
| M_STEREO_TAUTO_HASH                  | Tautomer invariant and stereo sensitive molecular hash codes                                                   |

## CoCoCo-Catalyst

Table 6SD. List of Catalyst parameters for conformational searches

| Parameter               | Description                            |
|-------------------------|----------------------------------------|
| Maximum conformers      | 250                                    |
| Conformational sampling | FAST                                   |
| Stereoisomer            | Independent treatment of stereoisomers |
| Shapes                  | Inclusion of shape files               |
| Properties files        | Inclusion of SPST files                |

Table 7SD. Example of a chunk directory content for CoCoCo-Catalyst

| Catalyst files        | Description                                                                                                                 |
|-----------------------|-----------------------------------------------------------------------------------------------------------------------------|
| CoCoCo.1.0.0bdb       | Binary file that contains conformers                                                                                        |
| CoCoCo.1.0.0bdb.names |                                                                                                                             |
| CoCoCo.1.0.2bdb       | Binary file that contains the 2D indexes, e.g. topologies and connection tables                                             |
| CoCoCo.1.0.3bdb       | Binary file that contains the 3D indexes, e.g. location constraints and hydrophobic points                                  |
| CoCoCo.1.0.4bdb       | Binary file that contains the shape indexes                                                                                 |
| CoCoCo.1.0.chm        | ASCII file that contains feature dictionary                                                                                 |
| CoCoCo.1.bdb          | ASCII file that contains the main configurations of the database, e.g. description of the locations of database components. |
| CoCoCo.1.spst         | Text-delimited file properties and 1D data                                                                                  |
| fragments.data        | Fragment database data file                                                                                                 |

Table 8SD. Detailed statistics of CoCoCo-Catalyst database chunks.

| Chunk number | Number of molecules | Number of conformations |
|--------------|---------------------|-------------------------|
| 1            | 200000              | 11062882                |
| 2            | 200000              | 15622960                |
| 3            | 200000              | 16667837                |
| 4            | 200000              | 11157700                |
| 5            | 200000              | 15030250                |
| 6            | 200000              | 18809947                |
| 7            | 200000              | 23807970                |
| 8            | 200000              | 22879374                |
| 9            | 199999              | 16596423                |
| 10           | 199994              | 14741428                |
| 11           | 200000              | 19862243                |
| 12           | 200000              | 18985214                |
| 13           | 200000              | 18329070                |
| 14           | 200000              | 19088404                |
| 15           | 200000              | 23348086                |
| 16           | 200000              | 22089737                |
| 17           | 200000              | 17766190                |
| 18           | 200000              | 16843451                |
| 19           | 199994              | 15617406                |
| 20           | 199969              | 18285526                |

Supplementary Data  
Del Rio et al, CoCoCo databases, 2010

|       |         |           |
|-------|---------|-----------|
| 21    | 200000  | 20105689  |
| 22    | 200000  | 18144156  |
| 23    | 200000  | 17672499  |
| 24    | 200000  | 17699509  |
| 25    | 199996  | 17760788  |
| 26    | 200000  | 16669130  |
| 27    | 199421  | 14374772  |
| 28    | 196506  | 11716566  |
| 29    | 196356  | 13325512  |
| 30    | 199904  | 17977085  |
| 31    | 199775  | 18843606  |
| 32    | 199924  | 16962094  |
| 33    | 198868  | 18669685  |
| 34    | 199938  | 14398690  |
| 35    | 181555  | 13010398  |
| Total | 6972199 | 603922277 |

---

## CoCoCo-Phase

Table 9SD. List of Ionizer parameters for calculating protonation states

| Parameter           | Description                                |
|---------------------|--------------------------------------------|
| pH of the medium    | 7.0                                        |
| Structure treatment | Only the most favorable structure retained |

Table 10SD. List of ConfGen parameters for conformational searches

| Parameter                    | Description                                   |
|------------------------------|-----------------------------------------------|
| Force field                  | OPLS 2005                                     |
| Energy window                | 100 kJ/mol                                    |
| Maximum number of conformers | 250                                           |
| Conformational sampling      | Rapid                                         |
| Conformer minimizations      | 100 steps                                     |
| Stereoisomers                | Independent treatment of stereoisomeric forms |

Table 11SD. Example of a chunk directory content for CoCoCo-Phase

| Catalyst files            | Description                                                                                                                                                        |
|---------------------------|--------------------------------------------------------------------------------------------------------------------------------------------------------------------|
| CoCoCo.1_dbInfo.log       | Log file for Phase database management                                                                                                                             |
| CoCoCo.1_dbversion        | Database version and format                                                                                                                                        |
| CoCoCo.1_feature.ini      | Feature definition file                                                                                                                                            |
| CoCoCo.1_master_phase.inp | Ligand location file                                                                                                                                               |
| CoCoCo.1_phasedb          | Phase database file                                                                                                                                                |
| CoCoCo.1_ligands          | Directory that stores ligands allocated in sub-directory blocks of 5000 ligands each. The content of each block directory is a Phase binary file with extension h5 |

Table 12SD. Detailed statistics of CoCoCo-Phase database chunks.

| Chunk number | Number of molecules | Number of conformations |
|--------------|---------------------|-------------------------|
| 1            | 199912              | 2738599                 |
| 2            | 199963              | 3302655                 |
| 3            | 199732              | 4027897                 |
| 4            | 199812              | 2785118                 |
| 5            | 199792              | 3360752                 |
| 6            | 199718              | 4759352                 |
| 7            | 199374              | 6669502                 |
| 8            | 199509              | 6586037                 |
| 9            | 199737              | 4030356                 |
| 10           | 199825              | 3196729                 |
| 11           | 199997              | 4443534                 |
| 12           | 199969              | 4398318                 |
| 13           | 199956              | 4644595                 |
| 14           | 199982              | 4789208                 |
| 15           | 200000              | 5278723                 |



Supplementary Data  
Del Rio et al, CoCoCo databases, 2010

|       |         |           |
|-------|---------|-----------|
| 16    | 200000  | 4964345   |
| 17    | 200000  | 4480156   |
| 18    | 200000  | 4280742   |
| 19    | 199854  | 3512070   |
| 20    | 199958  | 4278353   |
| 21    | 199999  | 4765932   |
| 22    | 199998  | 4523082   |
| 23    | 199996  | 4306319   |
| 24    | 199998  | 4256723   |
| 25    | 199995  | 4339594   |
| 26    | 199975  | 4243287   |
| 27    | 197233  | 3472465   |
| 28    | 191030  | 2906590   |
| 29    | 193241  | 3398200   |
| 30    | 199640  | 3804865   |
| 31    | 199591  | 4320951   |
| 32    | 199652  | 3779748   |
| 33    | 198497  | 3779205   |
| 34    | 199619  | 3201917   |
| 35    | 181335  | 2854353   |
| Total | 6956889 | 144480272 |

---

*CoCoCo-MC*

Table 13SD. Detailed statistics of CoCoCo-MC database chunks.

| Chunk number | Number of molecules | Number of conformations |
|--------------|---------------------|-------------------------|
| 1            | 199913              | 2738599                 |
| 2            | 199964              | 3302655                 |
| 3            | 199733              | 4027897                 |
| 4            | 199812              | 2785118                 |
| 5            | 199792              | 3360752                 |
| 6            | 199718              | 4759352                 |
| 7            | 199374              | 6669502                 |
| 8            | 199509              | 6586037                 |
| 9            | 199737              | 4030356                 |
| 10           | 199825              | 3196729                 |
| 11           | 199997              | 4443534                 |
| 12           | 199969              | 4398318                 |
| 13           | 199956              | 4644595                 |
| 14           | 199982              | 4789208                 |
| 15           | 200000              | 5278723                 |
| 16           | 200000              | 4964345                 |
| 17           | 200000              | 4480156                 |
| 18           | 200000              | 4280742                 |
| 19           | 199861              | 3512070                 |
| 20           | 199960              | 4278353                 |
| 21           | 200000              | 4765932                 |
| 22           | 200000              | 4523082                 |
| 23           | 199996              | 4306319                 |
| 24           | 199998              | 4256723                 |
| 25           | 199996              | 4339594                 |
| 26           | 199975              | 4243287                 |
| 27           | 197373              | 3472465                 |
| 28           | 191097              | 2906590                 |
| 29           | 193261              | 3398200                 |
| 30           | 199640              | 3804865                 |
| 31           | 199591              | 4320951                 |
| 32           | 199652              | 3779748                 |
| 33           | 198497              | 3779205                 |
| 34           | 199621              | 3201917                 |
| 35           | 181335              | 2854353                 |
| Total        | 6957134             | 144480272               |

*CoCoCo databases electronic resources*

URL: <http://cococo.unimore.it>

Contacts: Dr Alberto Del Rio  
Dipartimento di Scienze Farmaceutiche  
Università di Modena e Reggio Emilia  
Via Campi 183  
41100 Modena  
Italy  
Email <mailto:alberto.delrio@unimore.it>  
Tel (+39) 059 2055161  
Fax (+39) 059 2055131
